# Supplementary figures and images for: Laparoscopic approach for intermittent hydronephrosis caused by primary ureteral fibroepithelial polyps in children
Source: HighWire-hosted journal article supplement (doi:10.1136/wjps-2020-000243), 2021-03-01

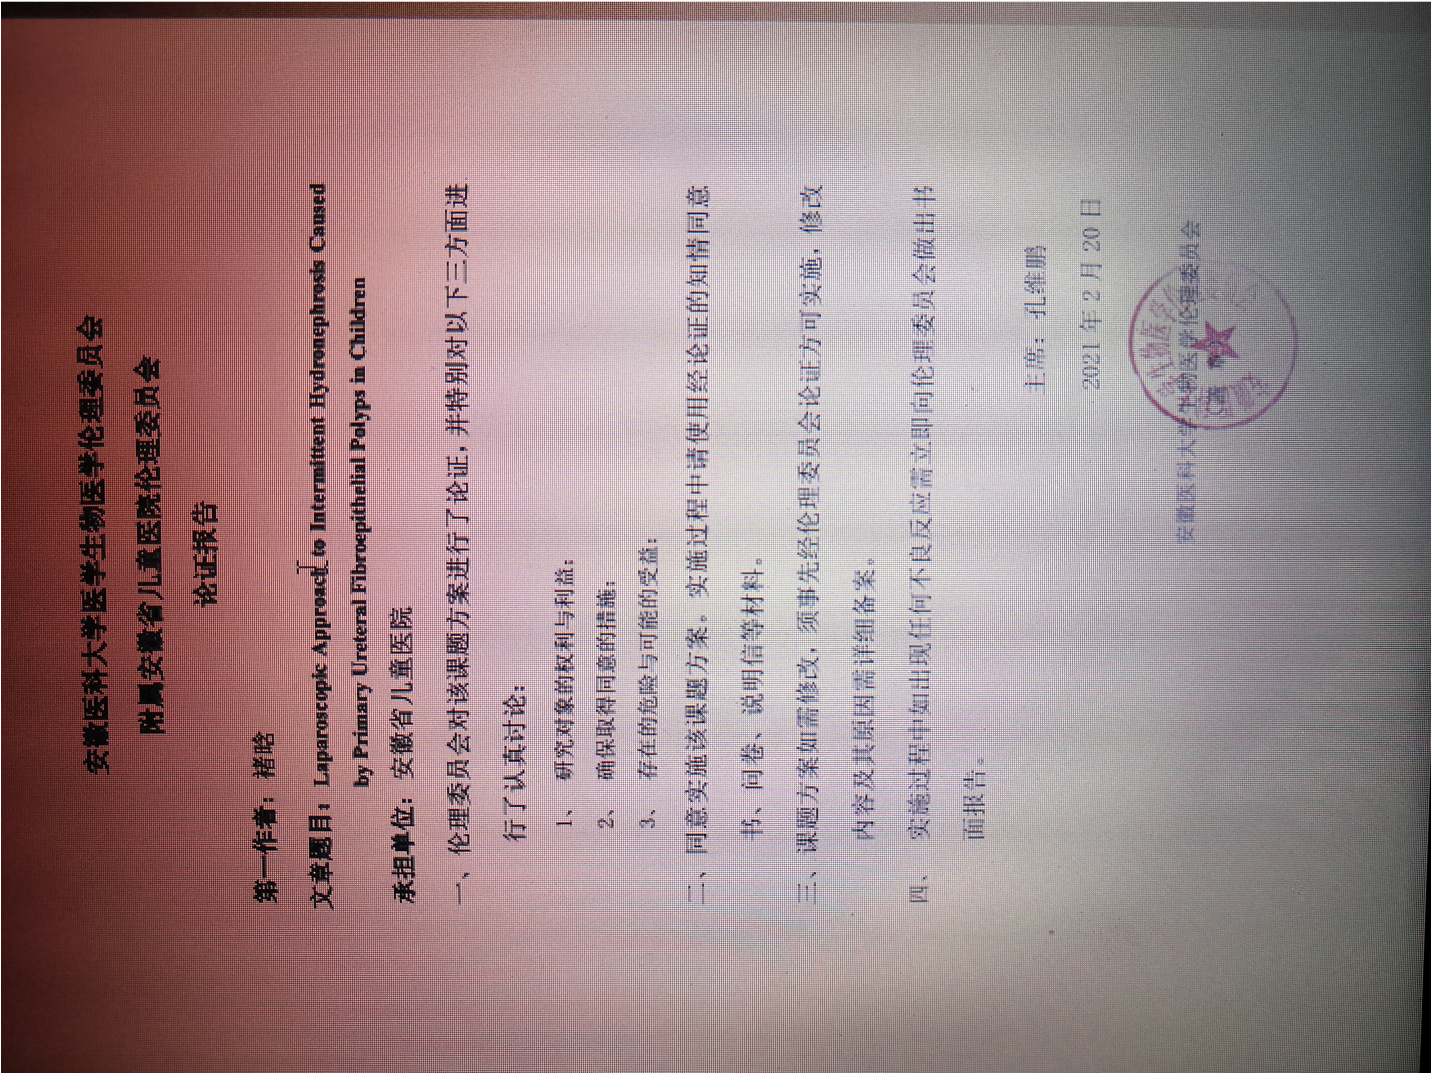

Supplement: wjps-2020-000243supp001_data_supplement.pdf [file wjps-2020-000243supp001_data_supplement.pdf]
